# Supplementary material
Source: PubMed Central journal article supplement (PMC3993350)
Supplement: JB.01463-13_zjb999093094so1.pdf [file JB.01463-13_zjb999093094so1.pdf]

## SUPPLEMENTAL FIGURES

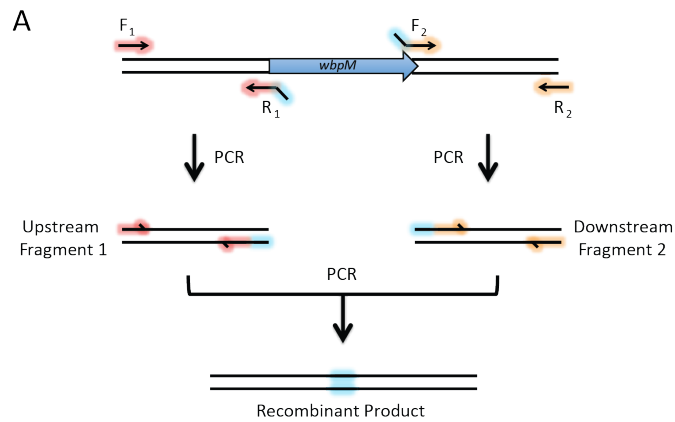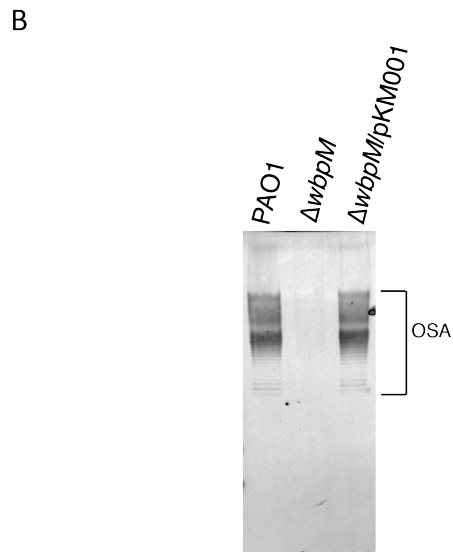

**FIG S1** Chromosomal knockout of *wbpM* by in-frame deletions and allelic replacement. Knockout of the *wbpM* gene from *P. aeruginosa* PAO1 was constructed as described in Materials and Methods following the schematic in (A). The *wbpM* gene was complemented back into the  $\Delta wbpM$  strain as described in Materials and Methods, and Western blot analysis was used to demonstrate the return of wildtype levels of OSA.

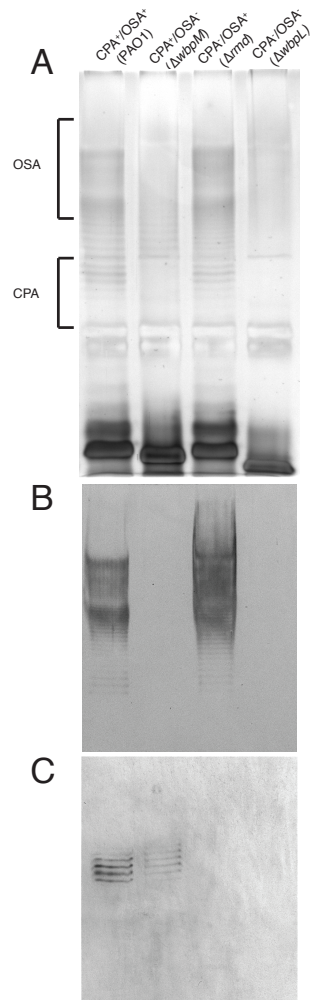

**FIG S2** O polysaccharide lipopolysaccharide expression. (A) Silver-stained SDS-polyacrylamide gel, and corresponding Western immunoblots specific for (B) OSA and (C) CPA LPS, demonstrating the differences in expression in the *P. aeruginosa* strains used in this study (Table 1).

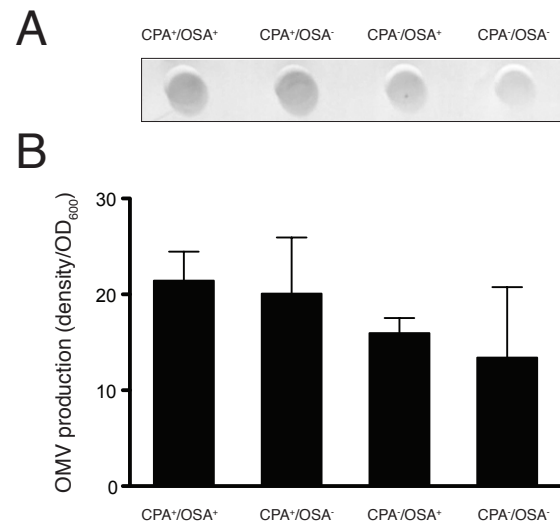

**FIG S3** OMV quantitation using anti-LPS monoclonal antibodies. (A) Representative OMV production (anti-LPS core mAb) dot blot immunoassay of purified OMVs. (B) Quantitative assessment of OMV production taken from densitometry readings from triplicate dot blot immunoassays demonstrating no significant difference in OMV production for all *P. aeruginosa* strains tested.
